# Supplementary material
Source: HighWire-hosted journal article supplement (http://jpet.aspetjournals.org/highwire/filestream/138465/field_highwire_adjunct_files/0/236562supplement_data.pdf)

# Akebia saponin D decreases hepatic steatosis through autophagy modulation

Li-li Gong, Guang-run Li, Wen Zhang, He Liu, Ya-li Lv, Fei-fei Han, Zi-Rui Wan,

Ming-Biao Shi, Li-hong Liu\*

Supplemental Table 1. Effects of ASD on indices of adiposity and insulin sensitivity of mice.

| Parameter                | C57BL/6J   | ob/ob                      |                            |                            |                            |                            |
|--------------------------|------------|----------------------------|----------------------------|----------------------------|----------------------------|----------------------------|
|                          | Sal        | Sal                        | SM(20mg/kg)                | ASD(30mg/kg)               | ASD(60mg/kg)               | ASD(120mg/kg)              |
| Body weight (g)          | 23.38±0.19 | 55.9±0.54 <sup>##</sup>    | 53.75±1.05                 | 54.73±1.12                 | 53.96±1.43                 | 51.25±1.24 <sup>**</sup>   |
| Fat pad weight(g)        | 0.27±0.02  | 3.90±0.04 <sup>##</sup>    | 3.36±0.22 <sup>**</sup>    | 3.70±0.08                  | 3.30±0.10 <sup>**</sup>    | 2.78±0.18 <sup>**</sup>    |
| Indices of adiposity (%) | 1.15±0.16  | 6.98±0.11 <sup>##</sup>    | 6.25±0.21                  | 6.76±0.18                  | 6.11±0.15                  | 5.42±0.17 <sup>**</sup>    |
| Liver weight (g)         | 0.89±0.12  | 3.92±0.11 <sup>##</sup>    | 3.62±0.17                  | 3.87±0.17                  | 3.62±0.14                  | 2.90±0.17 <sup>**</sup>    |
| Liver/body weight (%)    | 3.81±0.14  | 7.01±0.22 <sup>##</sup>    | 6.73±0.26                  | 7.07±0.14                  | 6.71±0.32                  | 5.66±0.15 <sup>**</sup>    |
| Fasting glucose (mmol/L) | 8.16±1.29  | 26.22±1.79 <sup>##</sup>   | 23.84±1.98                 | 24.17±0.77                 | 22.48±1.99                 | 21.68±1.79 <sup>**</sup>   |
| Fasting insulin (mIU/L)  | 6.36±0.12  | 190.85±60.15 <sup>##</sup> | 186.08±65.17               | 183.66±60.35 <sup>*</sup>  | 179.35±47.26 <sup>**</sup> | 173.12±38.57 <sup>**</sup> |
| HOMA-IR                  | 2.31±0.32  | 222.40±35.73 <sup>##</sup> | 197.16±41.26 <sup>**</sup> | 197.29±40.26 <sup>**</sup> | 179.19±25.21 <sup>**</sup> | 166.81±18.18 <sup>**</sup> |

Results are presented as means ± S.E.M., n = 6, Compared with normal control: <sup>##</sup>P < 0.01; compared with ob/ob

mice: <sup>\*</sup>P < 0.05, <sup>\*\*</sup>P < 0.01.

HOMA-IR = (fasting glucose levels [mmol/L]×fasting insulin levels [mIU/L])/22.5

Supplemental Figure 1. The chemical structure of Akebia saponin D.

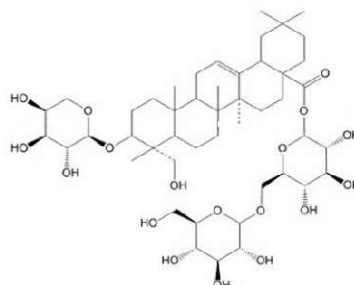

Supplemental Figure 2. HPLC chromatogram of Akebia saponin D.

(A) ASD Standard , (B) ASD Sample

$$C_{\text{Standard}} = \frac{1.80\text{mg}}{10\text{mL}} \times 92.5\% = 0.1665\text{mg/mL}, \quad A_{\text{Standard}} = 292556, \quad A_{\text{Sample}} = 294161,$$

$$V_{\text{Sample}} = 10\text{mL}, \quad M_{\text{Sample}} = 1.68\text{mg}.$$

$$\text{Purity (\%)} = \frac{C_{\text{Standard}} \times A_{\text{Sample}} \times V_{\text{Sample}}}{M_{\text{Sample}} \times A_{\text{Standard}}} \times 100\% = \frac{0.1665 \times 294161 \times 10}{1.68 \times 292556} \times 100\% =$$

99.65%

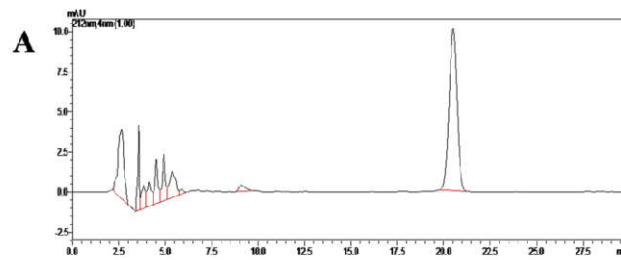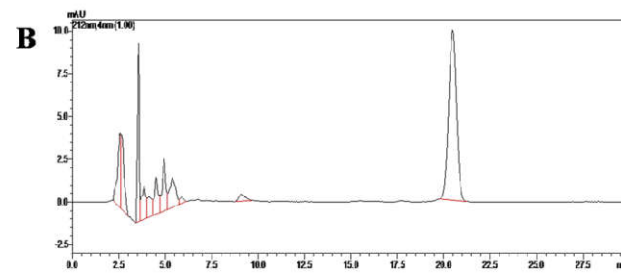

Supplement: 236562supplement_data.pdf [file 236562supplement_data.pdf]
